# Effects of 15-Deoxy- $\Delta^{12,14}$ -Prostaglandin J2 (15d-PGJ2) and Rosiglitazone on Human $V\delta 2^+$ T Cells

Haishan Li, C. David Pauza\*

Institute of Human Virology, University of Maryland School of Medicine, Baltimore, Maryland, United States of America

## Abstract

**Background:** Thiazolidinediones (TZD) class of drugs, and 15-deoxy-D12,14-prostaglandin J2 (15d-PGJ2) are immune regulators predicted to modulate human autoimmune disease. Their effects on  $\gamma\delta$  T cells, which are involved in animal model and human and animal autoimmune diseases, are unknown.

**Methodology/Principal Findings:** We characterized the activity of rosiglitazone (from the TZD class of drugs) and 15d-PGJ2 in human  $V\delta 2$  T cells. We found that 15d-PGJ2 and rosiglitazone had different effects on  $V\delta 2$  T cell functions. Both 15d-PGJ2 and rosiglitazone suppressed  $V\delta 2$  T cell proliferation in response to IPP and IL2. However, only 15d-PGJ2 suppressed functional responses including cytokine production, degranulation and cytotoxicity against tumor cells. The mechanism for 15d-PGJ2 effects on  $V\delta 2$  T cells acts through inhibiting Erk activation. In contrast, rosiglitazone did not affect Erk activation but the IL2 signaling pathway, which accounts for rosiglitazone suppression of IL2-dependent,  $V\delta 2$  T cell proliferation without affecting TCR-dependent functions. Rosiglitazone and 15d-PGJ2 are designed to be peroxisome proliferator-activated receptor gamma (PPAR $\gamma$ ) ligands and PPAR $\gamma$  was expressed in  $V\delta 2$  T cell. Surprisingly, when PPAR $\gamma$  levels were lowered by specific siRNA, 15d-PGJ2 and rosiglitazone were still active, suggesting their target of action induces cellular proteins other than PPAR $\gamma$ .

**Conclusions/Significance:** The current findings expand our understanding of how the immune system is regulated by rosiglitazone and 15d-PGJ2 and will be important to evaluate these compounds as therapeutic agents in human autoimmune disease.

**Citation:** Li H, Pauza CD (2009) Effects of 15-Deoxy- $\Delta^{12,14}$ -Prostaglandin J2 (15d-PGJ2) and Rosiglitazone on Human  $V\delta 2^+$  T Cells. PLoS ONE 4(11): e7726. doi:10.1371/journal.pone.0007726

**Editor:** Derya Unutmaz, New York University School of Medicine, United States of America

**Received:** July 20, 2009; **Accepted:** October 9, 2009; **Published:** November 4, 2009

**Copyright:** © 2009 Li, Pauza. This is an open-access article distributed under the terms of the Creative Commons Attribution License, which permits unrestricted use, distribution, and reproduction in any medium, provided the original author and source are credited.

**Funding:** Supported by Public Health Service grants CA113261 and CA142458 (C.D.P.). The funders had no role in study design, data collection and analysis, decision to publish, or preparation of the manuscript.

**Competing Interests:** The authors have declared that no competing interests exist.

\* E-mail: cdpauza@ihv.umaryland.edu

## Introduction

The incidence of autoimmune disease has been growing in recent years and the contribution to disease of various immune cell subsets are being defined. Research in autoimmunity focuses primarily on cells of the adaptive immune system and their roles in disease. Several studies implicated  $\gamma\delta$  T cells in animal models and human autoimmune diseases including multiple sclerosis (MS) [1,2], experimental allergic encephalomyelitis (EAE) [3], polymyositis [4,5], Bechet's disease [6,7], rheumatoid arthritis (RA) [8], atopic dermatitis (AD) [9] and systemic lupus erythematosus (SLE) [10]. Although the exact role for  $\gamma\delta$  T cells remains unknown, they possess potent cytotoxic activity, are major sources of cytokines including IFN- $\gamma$  and TNF- $\alpha$  and produce chemokines involved in recruiting monocyte/macrophages [11,12,13]. Recently,  $\gamma\delta$  T cells in mouse were reported to be an important source of IL17 [14,15,16,17,18]. These functions of activated  $\gamma\delta$  T cells could contribute significantly towards inflammatory processes and promote autoimmunity.

In humans,  $\gamma\delta$  T cells represent 1 to 10% of circulating T cells in blood, with the majority (>80%) expressing a  $V\gamma 2V\delta 2$  (also termed  $V\gamma 9V\delta 2$ ) TCR (hereafter referred as  $V\delta 2$  T cells) [19] that mediates broad reactivity against microbial agents and tumors. Cells in this subset recognize low molecular weight, non-peptidic compounds termed "phosphoantigens," including isopentyl pyrophosphate

(IPP) [20,21], an intermediate in sterol and isoprenoid biosynthesis. Following stimulation by phosphoantigens,  $V\delta 2$  T cells proliferate, release cytokines (particularly IFN- $\gamma$  and TNF- $\alpha$ ) [22,23] or chemokines [24,25], and acquire cytotoxic activity against tumor cells [26,27] or infected cells [28]. In view of the similarity between inflammatory processes in pathogen responses and autoimmune diseases, it is not surprising that  $V\delta 2$  T cells might participate in both. Thus, potential treatments for autoimmune diseases may involve modulating human  $\gamma\delta$  T cell function.

Peroxisome proliferator-activated receptor gamma (PPAR $\gamma$ ) is a ligand-dependent transcription factor that was recognized originally as a key regulator of adipocyte function [29,30]. Recent studies reported that PPAR $\gamma$  are expressed in many immune cells [31]; PPAR $\gamma$  ligands down-regulated dendritic cell [32], NK cell [33], B cell [34] and helper T cell [35], and enhanced regulatory T cell responses [36]. Some of the effects were proved to be PPAR $\gamma$ -independent [33,34,36]. Consequently, there have been many studies using PPAR $\gamma$  ligands in animal models of autoimmunity including experimental allergic encephalomyelitis, asthma, arthritis, and colitis [37,38,39,40,41,42,43,44,45,46]. The success of this approach has led to the potential use of PPAR $\gamma$  ligands as therapeutic agents in human autoimmune disease [47], even with the knowledge that these compounds may target molecule other than PPAR $\gamma$ .

15d-PGJ2 and the TZD class of drugs are two types of PPAR $\gamma$  ligands that are studied most often. In the present study, we used synthetic PPAR $\gamma$  ligands from the thiazolidinediones (TZD) class of drugs that are used widely for treating type 2 diabetes because they enhance insulin sensitivity [48] and the endogenous PPAR $\gamma$  ligand cyclopentanone prostaglandin15-deoxy-D12,14-prostaglandin J2 (15d-PGJ2) [49]. We tested their effects on human V $\delta$ 2 T cell function as a model for their impact on  $\gamma\delta$  T cells in autoimmune diseases. We also tested several different TZD class drugs, including rosiglitazone, troglitazone and ciglitazone all with similar results. We uncovered a mechanism for V $\delta$ 2<sup>+</sup> T cell inhibition that surprisingly, was partly independent of PPAR $\gamma$ .

## Results

### Both 15d-PGJ2 and Rosiglitazone Suppressed V $\delta$ 2 T Cell Proliferation

We tested the effects of PPAR $\gamma$  ligands on V $\delta$ 2 T cell proliferative response to phosphoantigen. Freshly isolated PBMC were treated with 15d-PGJ2 or rosiglitazone for 1 hour before adding IPP plus IL2. Cells were cultured for 10 days with IL2 added every 3 days. V $\delta$ 2 T cell frequency was measured every 3 days. As shown in figure 1, both 15d-PGJ2 (Figure 1A) and rosiglitazone (Figure 1B) suppressed IPP-driven V $\delta$ 2 T cell expansion in a dose-dependent manner. To reach similar effects, a 10-fold higher concentration of rosiglitazone was needed compared to 15d-PGJ2.

### 15d-PGJ2, but not Rosiglitazone, Suppressed Cytokine Production, Degranulation and Cytotoxicity

It was reported previously that expanded V $\delta$ 2 T cells (V $\delta$ 2 T cell line) but not fresh cells can kill tumor cell targets [27]. Here, we tested whether PPAR $\gamma$  ligands affect phosphoantigen-driven cytokine production and degranulation in V $\delta$ 2 T cell lines. Freshly isolated PBMC contained 1–10% of V $\delta$ 2 T cells; after 10 to 14 days of culture with IPP plus IL-2, the percentage of V $\delta$ 2 T cells was more than 90% (Figure 2A). V $\delta$ 2 T cell lines were rested after washing twice and culturing in fresh medium for 24 hours before they were treated with 15d-PGJ2 or rosiglitazone for 1 hour, then washed and stimulated with IPP. There was a dose-dependent suppression by 15d-PGJ2 of V $\delta$ 2 T cell IFN- $\gamma$  (Figure 2B) or TNF- $\alpha$  (Figure 2C) production and degranulation (CD107a expression) (Figure 2D). However, rosiglitazone had no effect on cytokine expression or degranulation, even at very high concentrations (Figure 2B, C and D).

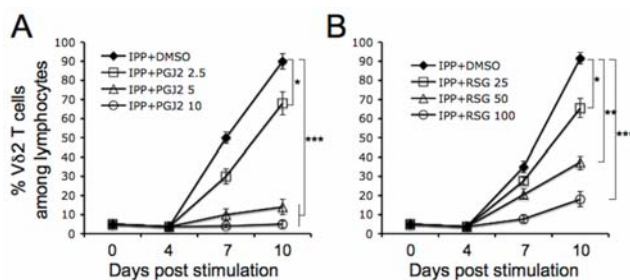

**Figure 1. Both 15d-PGJ2 and rosiglitazone suppressed IPP-stimulated V $\delta$ 2 T cell proliferation.** Freshly isolated PBMC was treated with 15d-PGJ2 (A) or rosiglitazone (B) at various concentrations ( $\mu$ M) for 1 hour, and then stimulated with IPP (15  $\mu$ M) plus IL2 (100U/ml). Cells were cultured for 10 days by adding IL2 every 3 days. V $\delta$ 2 T cell frequency was detected every 3 day. The experiments were set in triplicate. The statistical significance compared with drug vehicle (DMSO) control was analyzed. \*,  $P < 0.05$ ; \*\*,  $P < 0.01$ ; \*\*\*,  $P < 0.001$ . Data are representative of at least three independent experiments with different donors. doi:10.1371/journal.pone.0007726.g001

We also tested the effect of PPAR $\gamma$  ligands on V $\delta$ 2 T cell line cytotoxicity. Tumor cell lines were Daudi (a Burkitt's lymphoma) and TU167 (a squamous carcinoma). Lysis of both Daudi (Figure 2E) and TU167 (Figure 2F) cells were reduced significantly and in a dose dependent manner when V $\delta$ 2 T cells were treated with 15d-PGJ2 before adding to targets. Rosiglitazone did not alter V $\delta$ 2 cytotoxicity against Daudi (Figure 2G) or TU167 (Figure 2H) at any of the concentrations tested.

Th17 cells play important roles in autoimmune diseases [50,51,52,53] and a recent study showed that PPAR $\gamma$  selectively inhibits Th17 differentiation [54].  $\gamma\delta$  T cells are also recognized as an important source of IL-17 in mice [14,15,16,17,18]. However, it is not clear whether human  $\gamma\delta$  T cell can produce IL-17, although a recent study reported that human V $\delta$ 1 and V $\delta$ 2 T cell from HIV patient can produce both IL-17 and IFN- $\gamma$  [55]. We stimulated human PBMC from healthy donors with PMA/ionomycin and tested IL-17 production from several immune cell types. The CD4 T cells produced IL-17 as expected, a small frequency of V $\delta$ 1 T cell produced both IL-17 and IFN- $\gamma$  that is consistent with published data [55]. However, we did not find IL-17 production in V $\delta$ 2 T cells or other cell types (Figure 2I). We also stimulated V $\delta$ 2 T cell with IPP, but we still did not detect IL-17 production (data not shown).

### 15d-PGJ2 Suppressed V $\delta$ 2 T Cell Functions by Inhibiting Erk Activation

The V $\delta$ 2 T cell responses to phosphoantigen depends on TCR signaling. We tested 15d-PGJ2 for effects on the V $\delta$ 2 TCR signaling pathway as a possible explanation for inhibition of cytokine expression or cytotoxicity. The V $\delta$ 2 T cell lines were washed and incubated in fresh medium for 24 hours without stimulation. Then, cells were treated with 15d-PGJ2 or rosiglitazone for 1 hour followed by the addition of IPP. After 30 minutes, cells were collected for western blotting analyses. We measured phosphorylation of several signaling molecules implicated in TCR signal transduction: NF $\kappa$ B, Erk, p38 and PI-3K-associated Akt. Our results demonstrated that NF $\kappa$ B, p38 and Akt were constitutively activated (phosphorylated) in expanded V $\delta$ 2 T cell lines, although p38 and Akt were phosphorylated at a lower level compared to NF $\kappa$ B (Figure 3A, lane 1). Phosphorylated Erk was not detected (Figure 3A, lane 1). IPP-stimulation activated Erk and Akt but not NF $\kappa$ B (Figure 3A, lane 2). 15d-PGJ2 but not rosiglitazone suppressed IPP-activated Erk phosphorylation. Neither 15d-PGJ2 nor rosiglitazone affected NF $\kappa$ B, p38, or Akt activation (Figure 3A, lane 3 and 4).

We also tested whether Erk activation is important for V $\delta$ 2 T cell function. A highly selective inhibitor of MEK1/2, U0126, was used to inhibit Erk activation. The U0126 inhibited IPP-stimulated Erk activation in V $\delta$ 2 T cells in a dose-dependent manner (Figure 3B). When Erk activation was inhibited the functions of V $\delta$ 2 T cells, including cytokine production in response to IPP (Figure 3C, D) and cytotoxicity against tumor cells (Figure 3E, F) were suppressed. These results indicated that Erk activation is a key factor in V $\delta$ 2 TCR signaling pathway for functional responses. U0126 also suppressed V $\delta$ 2 T cell proliferation responses (Figure 3G). Based on these data, we believe that 15d-PGJ2 inhibits V $\delta$ 2 T cell functionality by inhibiting Erk activation.

### 15d-PGJ2 and Rosiglitazone Suppressed IL2-Induced Phosphorylation of STAT5 in V $\delta$ 2 T Cells

IPP-driven V $\delta$ 2 T cell proliferation depends on IL2. Rosiglitazone inhibited V $\delta$ 2 T cell proliferation without affecting the TCR signal. Thus, we postulated that rosiglitazone might inhibit

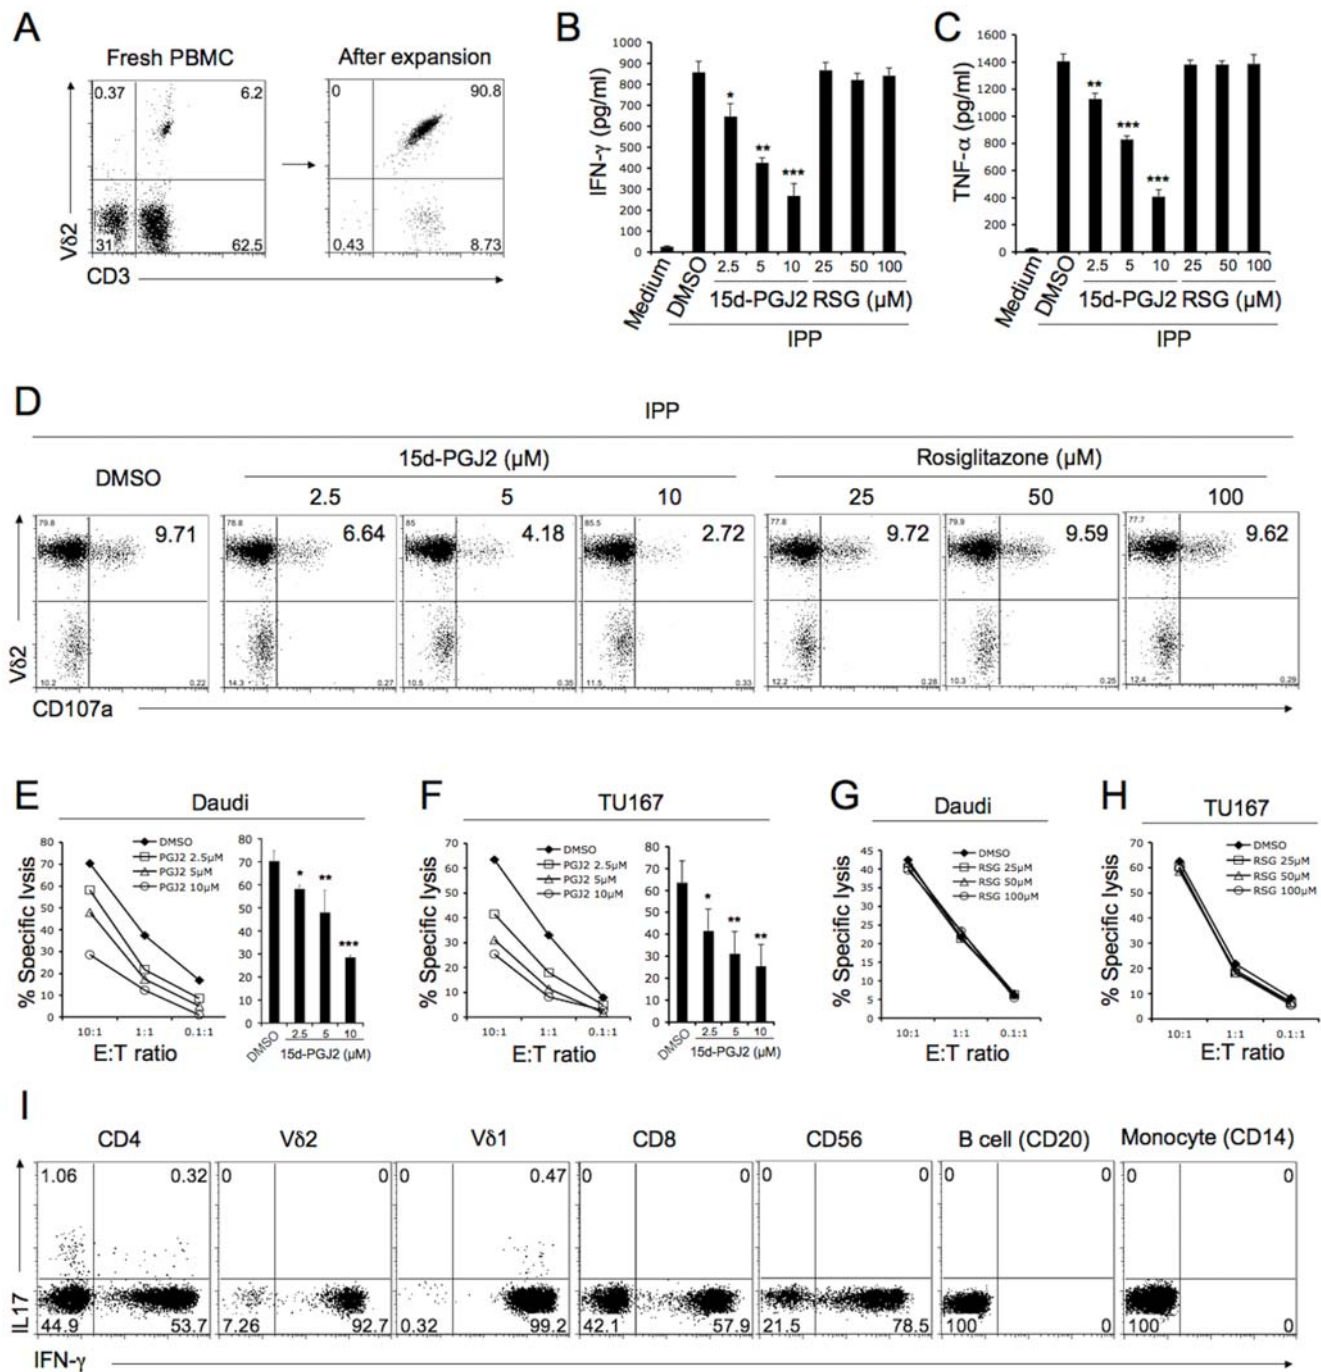

**Figure 2. 15d-PGJ2, but not rosiglitazone, suppressed cytokine production, degranulation and cytotoxicity functions of V $\delta$ 2 T cell.**

(A) Freshly isolated PBMC contained 1–10% of V $\delta$ 2 T cells (left panel); after 10 to 14 days of culture with IPP plus IL-2, the percentage of V $\delta$ 2 T cells was more than 90% (right panel). (B, C and D) V $\delta$ 2 T cells were treated with 15d-PGJ2 or rosiglitazone at various concentrations for 1 hour and then washed and stimulated with IPP (50  $\mu$ M). After stimulating for 4 hours, the levels of IFN- $\gamma$  (B) or TNF- $\alpha$  (C) in cell-free supernatant were detected by antigen capture ELISA. The experiments were done in triplicate and statistical tests compared drug and vehicle (DMSO). CD107a expression (D) was analyzed by flow cytometry. (E and F) V $\delta$ 2 T cells were pretreated with 15d-PGJ2 at various concentrations for 1 hour. The cytotoxicity of V $\delta$ 2 T cell against Daudi (E) or TU167 (F) was evaluated at different E:T ratios in triplicate. The statistical significance of specific lysis compared with a drug vehicle (DMSO) control at E:T = 5:1 was analyzed. (G and H) V $\delta$ 2 T cells were pretreated with rosiglitazone at various concentrations for 1 hour. The cytotoxicity of V $\delta$ 2 T cell against Daudi (G) or TU167 (H) was evaluated at different E:T ratios in triplicate. (I) PBMC was stimulated with PMA (10 ng/ml) and ionomycin (1  $\mu$ M) for 4 h. IL-17 production in different cell type was detected by flow cytometry. \*,  $P < 0.05$ ; \*\*,  $P < 0.01$ ; \*\*\*,  $P < 0.001$ . Data are representative of three independent experiments using different donors.

doi:10.1371/journal.pone.0007726.g002

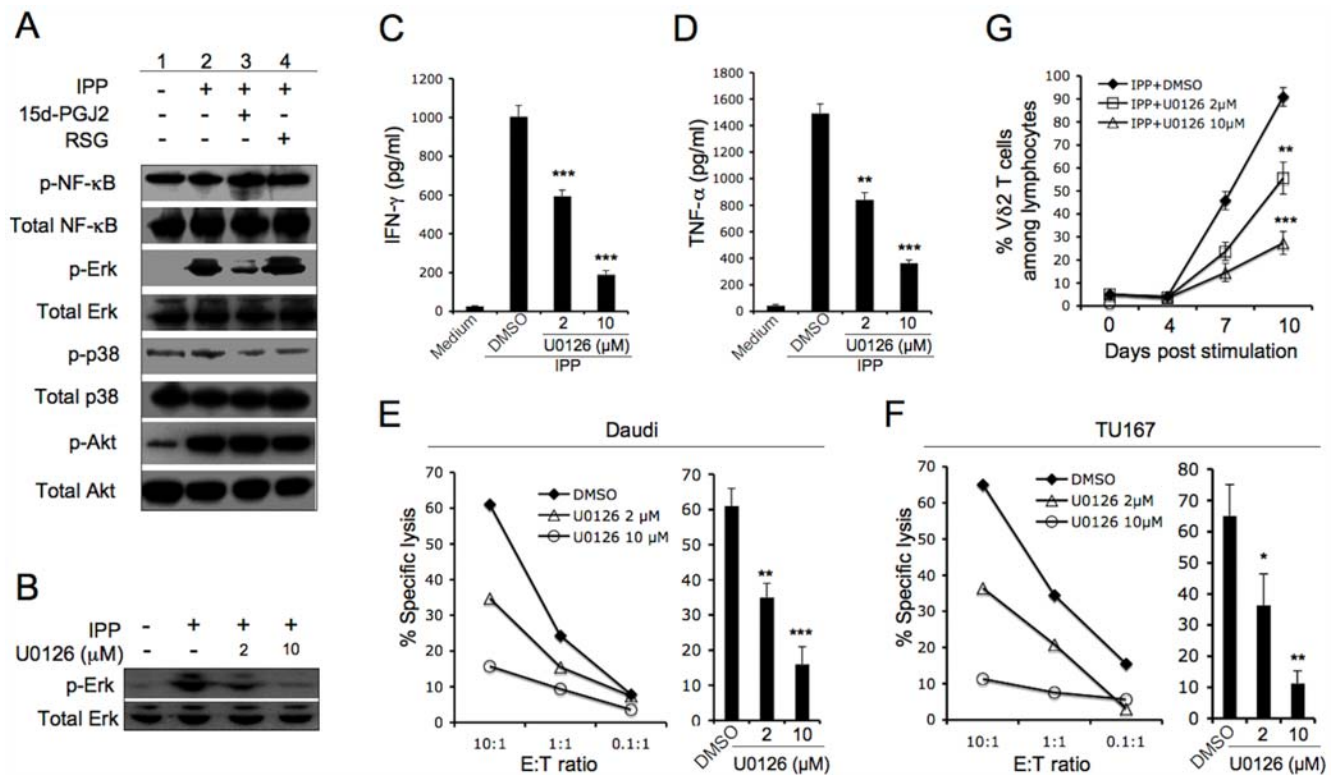

the IL2 signaling pathway. Purified V $\delta$ 2 T cells from fresh PBMC were pretreated with 15d-PGJ2 or rosiglitazone for 1 hour, then incubated with IL2 for 15 minutes. The phosphorylated STAT5 was stained with a specific antibody and detected by flow cytometry. Both 15d-PGJ2 (Figure 4A) and rosiglitazone (Figure 4B) suppressed IL2-induced phosphorylation of STAT5 in V $\delta$ 2 T cells.

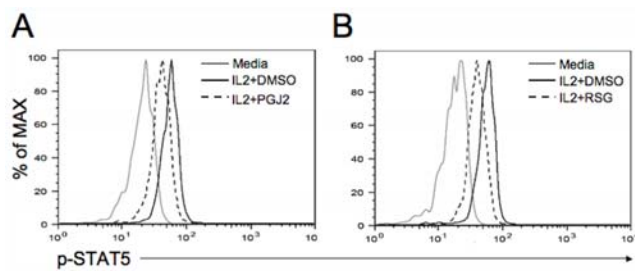

#### Primary and Expanded V $\delta$ 2 T Cells Express PPAR $\gamma$

15d-PGJ2 and rosiglitazone are also PPAR $\gamma$  ligands. We assessed PPAR $\gamma$  expression in primary V $\delta$ 2 T cell and IPP-expanded V $\delta$ 2 T cell lines. We examined the expression of PPAR $\gamma$  by intracellular staining and flow cytometry. PPAR $\gamma$  was present among V $\delta$ 2 cells (Figure 5A). We confirmed the result by western blotting using purified primary or expanded V $\delta$ 2 T cells (Figure 5B).

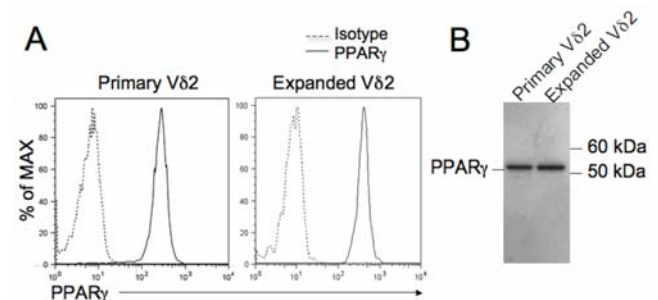

### PPAR $\gamma$ -Independent Effects of 15d-PGJ2 and Rosiglitazone on V $\gamma$ 2V $\delta$ 2 T Cell

PPAR $\gamma$  ligands have the curious property of acting in both PPAR $\gamma$ -dependent and independent ways. To test whether 15d-PGJ2 or rosiglitazone regulated V $\delta$ 2 T cell through PPAR $\gamma$ -dependent or independent mechanism, we used the PPAR $\gamma$  inhibitor GW9662 that covalently modifies the PPAR $\gamma$  ligand-binding domain and acts as an irreversible antagonist at concentrations of 100 nM or less [34,56]. We used the optimized concentration of 100 nM GW9662 for V $\delta$ 2 T cell. As shown in Figure 6, GW9662 alone did not inhibit IPP-driven V $\delta$ 2 proliferation (Figure 6A) or cytokine production (Figure 6B, C). Furthermore, GW9662 did not relieve the inhibitory effect of 15d-PGJ2 or rosiglitazone on V $\delta$ 2 proliferation (Figure 6A). Also, GW9662 did not prevent the inhibitory effect of 15d-PGJ2 on cytokine production (Figure 6B, C). We next used siRNA to knock down PPAR $\gamma$  and repeated the inhibition studies. A specific siRNA knocked down PPAR $\gamma$  protein levels (Figure 6D) but did not prevent the effects of 15d-PGJ2 or rosiglitazone on V $\delta$ 2 T cells (Figure 6E, F and G). These data argue that 15d-PGJ2 and rosiglitazone regulate V $\delta$ 2 T cells through PPAR $\gamma$ -independent mechanisms and the molecular target for these drugs has not yet been defined in human  $\gamma\delta$  T cells. As a positive control, we show

here that rosiglitazone increased the expression of CD36 in human monocytes, while GW9662 suppressed the effect of rosiglitazone (Figure 6H), which is consistent with a previous report [57].

### Discussion

In the present study, we report that 15d-PGJ2 and the TZD drug rosiglitazone had different effects on V $\delta$ 2 T cell functions. We also elucidated the underlying mechanisms by evaluating signal transduction pathways. This work will be important for understanding the effects of 15d-PGJ2 and the TZD drugs on immune responses and evaluating their application as therapeutic agents in human autoimmune disease.

15d-PGJ2 and rosiglitazone both suppressed V $\delta$ 2 T cell proliferation in response to IPP and IL2. Although TZD drugs have a higher binding affinity for PPAR $\gamma$  [31,48], rosiglitazone was less potent for inhibiting V $\delta$ 2 T cell proliferation. Only 15d-PGJ2 suppressed V $\delta$ 2 T cell functional responses including cytokine production, degranulation and cytotoxicity against tumor cells. Consequently, the effects of 15d-PGJ2 and rosiglitazone on V $\delta$ 2 cell responses to antigen appear to be independent of PPAR $\gamma$ . This hypothesis is supported by recent reports showing 15d-PGJ2 or TZD class drugs act independently of PPAR $\gamma$ . For example, 15d-PGJ2 or TZD drugs modulated regulatory T cell [36], NK

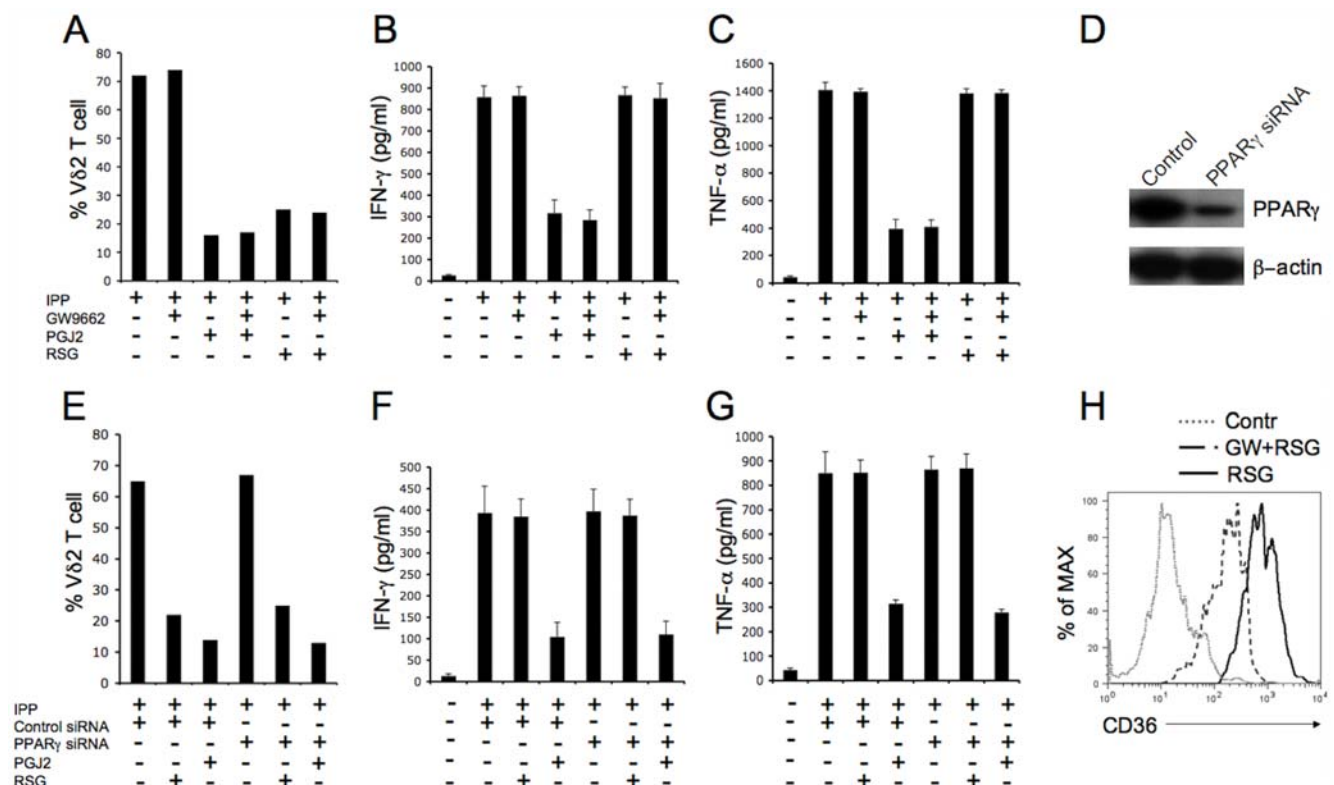

**Figure 6. The effects of 15d-PGJ2 and rosiglitazone on V $\gamma$ 2V $\delta$ 2 T cells are PPAR $\gamma$ -independent.** (A) Fresh isolated PBMC was pretreated with GW9662 (100nM) for 1 hour, then treated with 15d-PGJ2 (10  $\mu$ M) or rosiglitazone (50  $\mu$ M) and cultured with IPP (15  $\mu$ M) plus IL2 (100 U/ml). Cells were cultured for 10 days by adding IL2 every 3 days. V $\delta$ 2 T cell frequencies were detected at day 10. (B and C) The expanded V $\delta$ 2 T cells were rested by incubating in fresh medium for 24 hours without stimulation. The cells were pretreated with GW9662 (100 nM) for 1 hour, then washed and treated with 15d-PGJ2 (10  $\mu$ M) or rosiglitazone (50  $\mu$ M), and stimulated with IPP. After 4 hours stimulation, the levels of IFN- $\gamma$  (B) or TNF- $\alpha$  (C) in cell-free supernatants were detected by antigen capture ELISA. (D, E, F and G) Fresh isolated PBMC were transfected with control or PPAR $\gamma$  specific siRNA and cultured for 48 hours. Cells were then collected for western blotting analyses (D); or cells were treated with 15d-PGJ2 (10  $\mu$ M) or rosiglitazone (50  $\mu$ M), then cultured with IPP (15  $\mu$ M) plus IL2 (100 U/ml) for proliferation (E); or V $\delta$ 2<sup>+</sup> T cell were purified and treated with 15d-PGJ2 (10  $\mu$ M) or rosiglitazone (50  $\mu$ M) then stimulated with IPP for IFN- $\gamma$  (F) or TNF- $\alpha$  (G) analyses as described. Data are representative of three independent experiments with different donors. (H) Human monocytes were treated for 16 h with rosiglitazone (10  $\mu$ M) in the presence or not of GW9662 (100 nM). CD36 expression was analyzed by flow cytometry. doi:10.1371/journal.pone.0007726.g006

cell [33] and astrocyte [58] functions, and induced B cell apoptosis [34] through PPAR $\gamma$ -independent effects. These findings, along with our observation that a specific PPAR $\gamma$  antagonist or siRNA failed to block the effects of 15d-PGJ2 or rosiglitazone in V $\delta$ 2 T cells, support the view that a T cell target other than PPAR $\gamma$  is altered by these treatments. The PPAR $\gamma$  was expressed in V $\delta$ 2 T cells (Fig. 5) and most immune cells, although non-genomic action of PPAR $\gamma$  ligands have been reported. The continued study of PPAR $\gamma$  in V $\delta$ 2 T cell and other immune cell development and function may reveal a yet undiscovered role for PPAR $\gamma$  in the human immune system.

We postulated that 15d-PGJ2 or rosiglitazone might affect the V $\delta$ 2 TCR signaling pathway. The  $\alpha\beta$  TCR signaling pathway has been well studied, but less is known about the  $\gamma\delta$  TCR and its downstream signaling pathway. A recent paper reported that another phosphoantigen, (E)-4-hydroxy-3-methyl-but-2-enyl pyrophosphate (HMB-PP), induced MEK/Erk- and PI-3K/Akt-mediated signal transduction in primary V $\delta$ 2 T cells but IPP failed to induce Akt phosphorylation [59]. In the present study, we tested several key factors in the TCR signaling pathway of V $\delta$ 2 T cell lines after IPP stimulation including NF $\kappa$ B, Erk, p38, JNK and Akt. We found that NF $\kappa$ B, p38 and Akt, but not Erk and JNK (data not shown for JNK), were phosphorylated constitutively in V $\delta$ 2 T cell lines. IPP-stimulation activated Erk but not JNK, and increased the phosphorylation level of Akt but not NF $\kappa$ B. The NF $\kappa$ B signaling pathway might be important to V $\delta$ 2 T cell survival as we reported previously [60]. The Erk and Akt signaling pathway might have greater impact on functional responses by V $\delta$ 2 T cells. To test a hypothesis that Erk activation is responsible for V $\delta$ 2 T cell function, we inhibited Erk using U0126, a highly selective inhibitor of MEK1/2. We found that the cytokine production and cytotoxicity functions of V $\delta$ 2 T cell were suppressed when Erk was inhibited specifically, indicating a key role for Erk in V $\delta$ 2 T cell functions. The U0126 also suppressed V $\delta$ 2 T cell proliferation, indicating that Erk activation is important for initiating V $\delta$ 2 T cell proliferation.

The drugs 15d-PGJ2 and rosiglitazone were distinct in terms of their effects on the V $\delta$ 2 TCR signaling pathway. The 15d-PGJ2 but not rosiglitazone specifically inhibited Erk activation. This might explain why only 15d-PGJ2 suppressed V $\delta$ 2 T cell effector functions. It was unclear why rosiglitazone suppressed V $\delta$ 2 T cell proliferation since it did not affect the Erk activation. Because V $\delta$ 2 T cell proliferation requires IL2, we proposed that rosiglitazone might inhibit IL2 signaling. Indeed, both 15d-PGJ2 and rosiglitazone inhibited IL2-induced STAT5 activation, a key factor in the IL2 signaling pathway, arguing that rosiglitazone effects on IL2 signaling explained the inhibition of cell proliferation.

PPAR $\gamma$  ligands are effective in animal models of autoimmunity [38,39,41,42], leading to predictions about therapeutic potential in human disease [47]. The current findings expand our understanding of how the immune system is regulated by PPAR $\gamma$  ligands and will be helpful to evaluate their potential for human therapy. Data presented here also provide important information on the TCR signaling pathway in V $\delta$ 2 T cells and will be useful for understanding V $\delta$ 2 T cell function during treatments for autoimmune disease.

## Materials and Methods

### PBMC and Tumor Cell Lines

Whole blood was obtained from healthy human volunteers who provided written informed consent and all protocols were approved by the Institutional Review Board at the University of Maryland, Baltimore. Total lymphocytes were separated from

heparinized peripheral blood by density gradient centrifugation (Ficoll-Paque; Amersham Biosciences). Peripheral-blood mononuclear cells (PBMC) and TU167 cells (squamous cell carcinoma) were cultured in RPMI 1640 supplemented with 10% fetal bovine serum (FBS; GIBCO), 2 mMol/L L-glutamine, and penicillin-streptomycin (100 U/ml and 100 mg/ml, respectively); for Daudi B cells (CCL-213; ATCC), 4.5 g/L glucose, 1.5 g/L NaHCO<sub>3</sub>, 10 mMol/L HEPES, and 1 mMol/L sodium pyruvate were added.

### In Vitro Proliferation Assays

PBMC ( $5 \times 10^5$  cells/well) were cultured in 12-well plates with complete medium, 15  $\mu$ M isopentyl pyrophosphate (IPP) (Sigma) and 100 U/ml human recombinant IL-2 (Tecin, Biological Resources Branch, National Institutes of Health, Bethesda, MD). In some experiments, 15d-PGJ2 or rosiglitazone (Cayman Chemical Company, MI) were added. Fresh complete medium and 100 U/ml IL-2 were added every 3 days.  $\gamma\delta$  T cell proliferation was measured by staining for CD3 and V $\delta$ 2, then defining, by flow cytometry, the percentage of  $\gamma\delta$  T cells within the total lymphocyte population at days 0, 4, 7 and 10.

### RNA Interference

Fresh isolated PBMC were transfected with control siRNA or a specific siRNA that target PPAR $\gamma$  mRNA (Dharmacon) using a human T cell nucleofactor kit following the manufacturer's instructions (Amaxa Biosystem Inc. USA). Cells were used after 48 hours. The impact of RNA interference was evaluated by immunoblotting for the PPAR- $\gamma$  protein (see below).

### Purifying V $\delta$ 2<sup>+</sup> Cells and Monocytes

The V $\delta$ 2<sup>+</sup> or CD14<sup>+</sup> monocyte subsets were purified from fresh PBMC or PBMC expanded with IPP and IL-2 using a MultiSort Kit (MiltenyiBiotec, Auburn, CA) according to the manufacturer's instructions. Cells were stained with PE-conjugate V $\delta$ 2 or CD14 antibodies for 10 minutes on ice. The labeled cells were washed and incubated with anti-PE MicroBeads for 15 minutes on ice, then separated in a magnetic field. We achieved 90 to 98% purity after magnetic bead separation as measured by flow cytometry.

### Immunoblot Analysis

Cells ( $2 \times 10^6$ ) were lysed in gel loading buffer (Invitrogen, Carlsbad, CA); samples were boiled for 10 minutes and proteins were separated by SDS-PAGE. Proteins were transferred to nitrocellulose membranes and probed with various primary antibodies. Secondary antibodies including HRP-conjugated, anti-rabbit or anti-mouse (Cell Signaling Technology, Inc.) were visualized with enhanced chemiluminescence (GE Healthcare, Buckinghamshire, UK) and exposure to Kodak X-ray film.

### Cytotoxicity Assay

A nonradioactive, fluorometric cytotoxicity assay with calcein-acetoxymethyl (calcein-AM; Molecular Probes) was used to measure cytotoxicity against Daudi B cell or TU167 squamous cell tumor lines [60]. Expanded  $\gamma\delta$  cells (effector cells) were treated with 15d-PGJ2 or rosiglitazone (Cayman Chemical Company, MI) at varying concentrations for 1 hour at 37°C. Daudi B or TU167 target cells were labeled for 15 minutes with 2 mMol/L calcein-AM at 37°C and then washed once with PBS. Cells were combined at various effector-to-target (E:T) ratios in 96-well, round-bottomed microtiter plates (Corning, NY) and incubated at 37°C in 5% CO<sub>2</sub> for 4 hours; assays were performed in triplicate. After incubation, supernatants were transferred to a 96-well flat-bottomed microtiter plate and

calcein content was measured using a Wallac Victor2 1420 multi-channel counter (485/535 nm). Percent specific lysis was calculated as: (test release-spontaneous release)/(maximum release-spontaneous release)  $\times 100$ .

### Flow Cytometry

Unless noted, cells were stained with fluorophore-conjugated monoclonal antibodies from BD Biosciences, San Jose, CA. Generally,  $3 \times 10^5$ – $5 \times 10^5$  cells were washed, resuspended in 50–100  $\mu\text{L}$  of RPMI 1640, and stained with mouse anti-human V $\delta 2$ -PE clone B6, mouse anti-human CD3-fluorescein isothiocyanate (FITC) clone UCHT1, mouse anti-human CD3-allophycocyanin (APC) clone UCHT1, mouse anti-human CD107a-FITC clone H4A3, and isotype controls, including rabbit anti-mouse IgG1-FITC clone X40, IgG1-PE clone X40, and IgG1-APC clone X40. For detecting intracellular IL-17, cells were stained with mouse anti-human CD4 (PerCP), mouse anti-CD8 (PerCP), mouse anti-human V $\delta 2$ -PE, mouse anti-human V $\delta 1$  (FITC), mouse anti-human CD20 (PE), mouse anti-human CD14 (PE), mouse anti-human CD56 (PE), then fixed, permeabilized and incubated for 45 min at 4°C with mouse anti-human IL-17 (FITC or PE). Intracellular staining solutions were obtained from the Cytofix/Cytoperm Kit (BD Biosciences). For intracellular PPAR $\gamma$  and phospho-STAT5 staining, treated and untreated cells were fixed by adding 16% formaldehyde directly into the culture medium to obtain a final concentration of 2–4% formaldehyde. Cells were incubated in fixative for 10 minutes at 37°C and pelleted. They were then permeabilized by resuspending with vigorous vortexing in 500  $\mu\text{L}$  ice-cold methanol and placed on ice at least 30 minutes. Cells were washed twice in staining medium (PBS containing 0.5% BSA) then resuspended in staining medium at  $0.5 \sim 1 \times 10^6$  cells per 100  $\mu\text{L}$  and blocked in staining buffer for 10 minutes at room temperature. Optimal concentrations of mAB against PPAR $\gamma$  (clone E8, Santa Cruz Biotechnology, Inc.) or

phospho-STAT5 (pY694, clone 47) were added and incubated for 1 hour at room temperature. Cells were washed with staining buffer and resuspended. Data for at least  $1 \times 10^4$  lymphocytes (gated on the basis of forward- and side-scatter profiles) were acquired from each sample on a FACSCalibur flow cytometer (BD Biosciences). All samples were analyzed using FlowJo software (FlowJo 8.8.2, Tree Star, San Carlos, CA). For stimulation before staining, PBMC or V $\delta 2$  T cells were treated with IPP or PMA/ionomycin for 4 hours. In some experiments, V $\delta 2$  T cells were treated with 15d-PGJ2 or rosiglitazone (Cayman Chemical Company, MI) at varying concentrations for 1 hour at 37°C before stimulation and then washed.

### Detecting Cytokines by ELISA

Human IFN- $\gamma$  in culture supernatants was detected with a human IFN- $\gamma$  ELISA kit (R&D Systems), according to the manufacturer's directions. Human TNF- $\alpha$  in culture supernatants was detected with a human TNF- $\alpha$  ELISA kit (R&D Systems), according to the manufacturer's directions.

### Statistical Analysis

Differences among groups were analyzed by Student's t test.  $P < 0.05$  was considered to be significant.

### Acknowledgments

We would like to thank Cheryl Armstrong for technical assistance.

### Author Contributions

Conceived and designed the experiments: HL CDP. Performed the experiments: HL. Analyzed the data: HL CDP. Contributed reagents/materials/analysis tools: CDP. Wrote the paper: HL CDP.

### References

- Battistini L, Selmaj K, Kowal C, Ohmen J, Modlin RL, et al. (1995) Multiple sclerosis: limited diversity of the V delta 2-J delta 3 T-cell receptor in chronic active lesions. *Ann Neurol* 37: 198–203.
- Selmaj K, Brosnan CF, Raine CS (1991) Colocalization of lymphocytes bearing gamma delta T-cell receptor and heat shock protein hsp65+ oligodendrocytes in multiple sclerosis. *Proc Natl Acad Sci U S A* 88: 6452–6456.
- Rajan AJ, Gao YL, Raine CS, Brosnan CF (1996) A pathogenic role for gamma delta T cells in relapsing-remitting experimental allergic encephalomyelitis in the SJL mouse. *J Immunol* 157: 941–949.
- Hohlfeld R, Engel AG, Ii K, Harper MC (1991) Polymyositis mediated by T lymphocytes that express the gamma/delta receptor. *N Engl J Med* 324: 877–881.
- Wiendl H, Malotka J, Holzwarth B, Weltzien HU, Wekerle H, et al. (2002) An autoreactive gamma delta TCR derived from a polymyositis lesion. *J Immunol* 169: 515–521.
- Yamashita N, Kaneoka H, Kaneko S, Takeno M, Oneda K, et al. (1997) Role of gammadelta T lymphocytes in the development of Behcet's disease. *Clin Exp Immunol* 107: 241–247.
- Bank I, Duvdevani M, Livneh A (2003) Expansion of gammadelta T-cells in Behcet's disease: role of disease activity and microbial flora in oral ulcers. *J Lab Clin Med* 141: 33–40.
- Holoshitz J (1999) Activation of gammadelta T cells by mycobacterial antigens in rheumatoid arthritis. *Microbes Infect* 1: 197–202.
- Cairo C, Arabito E, Landi F, Casati A, Brunetti E, et al. (2005) Analysis of circulating gammadelta T cells in children affected by IgE-associated and non-IgE-associated allergic atopic eczema/dermatitis syndrome. *Clin Exp Immunol* 141: 116–121.
- Robak E, Blonski JZ, Bartkowiak J, Niewiadomska H, Sysa-Jedrzejowska A, et al. (1999) Circulating TCR gammadelta cells in the patients with systemic lupus erythematosus. *Mediators Inflamm* 8: 305–312.
- Battistini L, Caccamo N, Borsellino G, Meraviglia S, Angelini DF, et al. (2005) Homing and memory patterns of human gammadelta T cells in physiopathological situations. *Microbes Infect* 7: 510–517.
- Brosnan CF, Raine CS (1996) Mechanisms of immune injury in multiple sclerosis. *Brain Pathol* 6: 243–257.
- Carding SR, Egan PJ (2002) Gammadelta T cells: functional plasticity and heterogeneity. *Nat Rev Immunol* 2: 336–345.
- Sutton CE, Lalor SJ, Sweeney CM, Brereton CF, Lavelle EC, et al. (2009) Interleukin-1 and IL-23 induce innate IL-17 production from gammadelta T cells, amplifying Th17 responses and autoimmunity. *Immunity* 31: 331–341.
- Martin B, Hirota K, Cua DJ, Stockinger B, Veldhoen M (2009) Interleukin-17-producing gammadelta T cells selectively expand in response to pathogen products and environmental signals. *Immunity* 31: 321–330.
- Shichita T, Sugiyama Y, Ooboshi H, Sugimori H, Nakagawa R, et al. (2009) Pivotal role of cerebral interleukin-17-producing gammadelta T cells in the delayed phase of ischemic brain injury. *Nat Med* 15: 946–950.
- O'Brien RL, Roark CL, Born WK (2009) IL-17-producing gammadelta T cells. *Eur J Immunol* 39: 662–666.
- Roark CL, Simonian PL, Fontenot AP, Born WK, O'Brien RL (2008) Gammadelta T cells: an important source of IL-17. *Curr Opin Immunol* 20: 353–357.
- Evans PS, Enders PJ, Yin C, Ruckwardt TJ, Malkovsky M, et al. (2001) In vitro stimulation with a non-peptidic alkylphosphate expands cells expressing Vgamma2/Jgamma1.2/Vdelta2 T-cell receptors. *Immunology* 104: 19–27.
- Constant P, Davodeau F, Peyrat MA, Poquet Y, Puzo G, et al. (1994) Stimulation of human gamma delta T cells by nonpeptidic mycobacterial ligands. *Science* 264: 267–270.
- Tanaka Y, Morita CT, Nieves E, Brenner MB, Bloom BR (1995) Natural and synthetic non-peptide antigens recognized by human gamma delta T cells. *Nature* 375: 155–158.
- Garcia VE, Sieling PA, Gong J, Barnes PF, Uyemura K, et al. (1997) Single-cell cytokine analysis of gamma delta T cell responses to nonpeptide mycobacterial antigens. *J Immunol* 159: 1328–1335.
- Lang F, Peyrat MA, Constant P, Davodeau F, David-Ameline J, et al. (1995) Early activation of human V gamma 9V delta 2 T cell broad cytotoxicity and TNF production by nonpeptidic mycobacterial ligands. *J Immunol* 154: 5986–5994.
- Poccia F, Battistini L, Cipriani B, Mancino G, Martini F, et al. (1999) Phosphoantigen-reactive Vgamma9Vdelta2 T lymphocytes suppress in vitro human immunodeficiency virus type 1 replication by cell-released antiviral factors including CC chemokines. *J Infect Dis* 180: 858–861.
- Tikhonov I, Deetz CO, Paca R, Berg S, Lukyanenko V, et al. (2006) Human Vgamma2Vdelta2 T cells contain cytoplasmic RANTES. *Int Immunol* 18: 1243–1251.

26. Bukowski JF, Morita CT, Tanaka Y, Bloom BR, Brenner MB, et al. (1995) V gamma 2V delta 2 TCR-dependent recognition of non-peptide antigens and Daudi cells analyzed by TCR gene transfer. *J Immunol* 154: 998–1006.
27. Alexander AA, Maniar A, Cummings JS, Hebbeler AM, Schulze DH, et al. (2008) Isopentenyl pyrophosphate-activated CD56+  $\gamma\delta$  T lymphocytes display potent antitumor activity toward human squamous cell carcinoma. *Clin Cancer Res* 14: 4232–4240.
28. Ottonnes F, Dornand J, Naroeni A, Liautard JP, Favero J (2000) V gamma 9V delta 2 T cells impair intracellular multiplication of *Brucella suis* in autologous monocytes through soluble factor release and contact-dependent cytotoxic effect. *J Immunol* 165: 7133–7139.
29. Tontonoz P, Hu E, Spiegelman BM (1994) Stimulation of adipogenesis in fibroblasts by PPAR gamma 2, a lipid-activated transcription factor. *Cell* 79: 1147–1156.
30. Tontonoz P, Hu E, Spiegelman BM (1995) Regulation of adipocyte gene expression and differentiation by peroxisome proliferator activated receptor gamma. *Curr Opin Genet Dev* 5: 571–576.
31. Szeles L, Torocsik D, Nagy L (2007) PPARgamma in immunity and inflammation: cell types and diseases. *Biochim Biophys Acta* 1771: 1014–1030.
32. Szatmari I, Torocsik D, Agostini M, Nagy T, Gurnell M, et al. (2007) PPARgamma regulates the function of human dendritic cells primarily by altering lipid metabolism. *Blood* 110: 3271–3280.
33. Zhang X, Rodriguez-Galan MC, Subleski JJ, Ortaldo JR, Hodge DL, et al. (2004) Peroxisome proliferator-activated receptor-gamma and its ligands attenuate biologic functions of human natural killer cells. *Blood* 104: 3276–3284.
34. Ray DM, Akbiyik F, Phipps RP (2006) The peroxisome proliferator-activated receptor gamma (PPARgamma) ligands 15-deoxy-Delta12,14-prostaglandin J2 and ciglitazone induce human B lymphocyte and B cell lymphoma apoptosis by PPARgamma-independent mechanisms. *J Immunol* 177: 5068–5076.
35. Clark RB, Bishop-Bailey D, Estrada-Hernandez T, Hla T, Puddington L, et al. (2000) The nuclear receptor PPAR gamma and immunoregulation: PPAR gamma mediates inhibition of helper T cell responses. *J Immunol* 164: 1364–1371.
36. Wohlfert EA, Nichols FC, Nevius E, Clark RB (2007) Peroxisome proliferator-activated receptor gamma (PPARgamma) and immunoregulation: enhancement of regulatory T cells through PPARgamma-dependent and -independent mechanisms. *J Immunol* 178: 4129–4135.
37. Natarajan C, Bright JJ (2002) Peroxisome proliferator-activated receptor-gamma agonists inhibit experimental allergic encephalomyelitis by blocking IL-12 production, IL-12 signaling and Th1 differentiation. *Genes Immun* 3: 59–70.
38. Natarajan C, Muthian G, Barak Y, Evans RM, Bright JJ (2003) Peroxisome proliferator-activated receptor-gamma-deficient heterozygous mice develop an exacerbated neural antigen-induced Th1 response and experimental allergic encephalomyelitis. *J Immunol* 171: 5743–5750.
39. Shiojiri T, Wada K, Nakajima A, Katayama K, Shibuya A, et al. (2002) PPAR gamma ligands inhibit nitrotyrosine formation and inflammatory mediator expressions in adjuvant-induced rheumatoid arthritis mice. *Eur J Pharmacol* 448: 231–238.
40. Saubermann IJ, Nakajima A, Wada K, Zhao S, Terauchi Y, et al. (2002) Peroxisome proliferator-activated receptor gamma agonist ligands stimulate a Th2 cytokine response and prevent acute colitis. *Inflamm Bowel Dis* 8: 330–339.
41. Woerly G, Honda K, Loyens M, Papin JP, Auwerx J, et al. (2003) Peroxisome proliferator-activated receptors alpha and gamma down-regulate allergic inflammation and eosinophil activation. *J Exp Med* 198: 411–421.
42. Hammad H, de Heer HJ, Soullie T, Angeli V, Trottein F, et al. (2004) Activation of peroxisome proliferator-activated receptor-gamma in dendritic cells inhibits the development of eosinophilic airway inflammation in a mouse model of asthma. *Am J Pathol* 164: 263–271.
43. Mueller C, Weaver V, Vanden Heuvel JP, August A, Cantorna MT (2003) Peroxisome proliferator-activated receptor gamma ligands attenuate immunological symptoms of experimental allergic asthma. *Arch Biochem Biophys* 418: 186–196.
44. Ueki S, Matsuwaki Y, Kayaba H, Oyamada H, Kanda A, et al. (2004) Peroxisome proliferator-activated receptor gamma regulates eosinophil functions: a new therapeutic target for allergic airway inflammation. *Int Arch Allergy Immunol* 134 Suppl 1: 30–36.
45. Beales PE, Liddi R, Giorgini AE, Signore A, Procaccini E, et al. (1998) Troglitazone prevents insulin dependent diabetes in the non-obese diabetic mouse. *Eur J Pharmacol* 357: 221–225.
46. Augstein P, Dunger A, Heinke P, Wachlin G, Berg S, et al. (2003) Prevention of autoimmune diabetes in NOD mice by troglitazone is associated with modulation of ICAM-1 expression on pancreatic islet cells and IFN-gamma expression in splenic T cells. *Biochem Biophys Res Commun* 304: 378–384.
47. Pershad Singh HA, Heneka MT, Saini R, Amin NM, Broeske DJ, et al. (2004) Effect of pioglitazone treatment in a patient with secondary multiple sclerosis. *J Neuroinflammation* 1: 3.
48. Lehmann JM, Moore LB, Smith-Oliver TA, Wilkison WO, Willson TM, et al. (1995) An antidiabetic thiazolidinedione is a high affinity ligand for peroxisome proliferator-activated receptor gamma (PPAR gamma). *J Biol Chem* 270: 12953–12956.
49. Forman BM, Tontonoz P, Chen J, Brun RP, Spiegelman BM, et al. (1995) 15-Deoxy-delta 12, 14-prostaglandin J2 is a ligand for the adipocyte determination factor PPAR gamma. *Cell* 83: 803–812.
50. Cua DJ, Sherlock J, Chen Y, Murphy CA, Joyce B, et al. (2003) Interleukin-23 rather than interleukin-12 is the critical cytokine for autoimmune inflammation of the brain. *Nature* 421: 744–748.
51. Murphy CA, Langrish CL, Chen Y, Blumenschein W, McClanahan T, et al. (2003) Divergent pro- and anti-inflammatory roles for IL-23 and IL-12 in joint autoimmune inflammation. *J Exp Med* 198: 1951–1957.
52. Follows GA, Dhami P, Gottgens B, Bruce AW, Campbell PJ, et al. (2006) Identifying gene regulatory elements by genomic microarray mapping of DNaseI hypersensitive sites. *Genome Res* 16: 1310–1319.
53. Tzartos JS, Friese MA, Craner MJ, Palace J, Newcombe J, et al. (2008) Interleukin-17 production in central nervous system-infiltrating T cells and glial cells is associated with active disease in multiple sclerosis. *Am J Pathol* 172: 146–155.
54. Klotz L, Burgdorf S, Dani I, Saijo K, Flossdorf J, et al. (2009) The nuclear receptor PPAR{gamma} selectively inhibits Th17 differentiation in a T cell-intrinsic fashion and suppresses CNS autoimmunity. *J Exp Med*.
55. Fenoglio D, Poggi A, Catellani S, Battaglia F, Ferrera A, et al. (2009) Vdelta1 T lymphocytes producing IFN-gamma and IL-17 are expanded in HIV-1-infected patients and respond to *Candida albicans*. *Blood* 113: 6611–6618.
56. Leesnitzer LM, Parks DJ, Bledsoe RK, Cobb JE, Collins JL, et al. (2002) Functional consequences of cysteine modification in the ligand binding sites of peroxisome proliferator activated receptors by GW9662. *Biochemistry* 41: 6640–6650.
57. Berry A, Balard P, Coste A, Olganier D, Lagane C, et al. (2007) IL-13 induces expression of CD36 in human monocytes through PPARgamma activation. *Eur J Immunol* 37: 1642–1652.
58. Phulwani NK, Feinstein DL, Gavrilyuk V, Akar C, Kielian T (2006) 15-deoxy-Delta12,14-prostaglandin J2 (15d-PGJ2) and ciglitazone modulate *Staphylococcus aureus*-dependent astrocyte activation primarily through a PPAR-gamma-independent pathway. *J Neurochem* 99: 1389–1402.
59. Correia DV, d'Orey F, Cardoso BA, Lanca T, Grosso AR, et al. (2009) Highly active microbial phosphoantigen induces rapid yet sustained MEK/Erk- and PI-3K/Akt-mediated signal transduction in anti-tumor human gammadelta T-cells. *PLoS ONE* 4: e5657.
60. Li H, Luo K, Pauza CD (2008) TNF-alpha is a positive regulatory factor for human Vgamma2 Vdelta2 T cells. *J Immunol* 181: 7131–7137.
